# Supplementary material
Source: publisher site journal article supplement (http://mycokeys.pensoft.net/article/4799/download/suppl/31/)
Supplement: Supplementary file 1

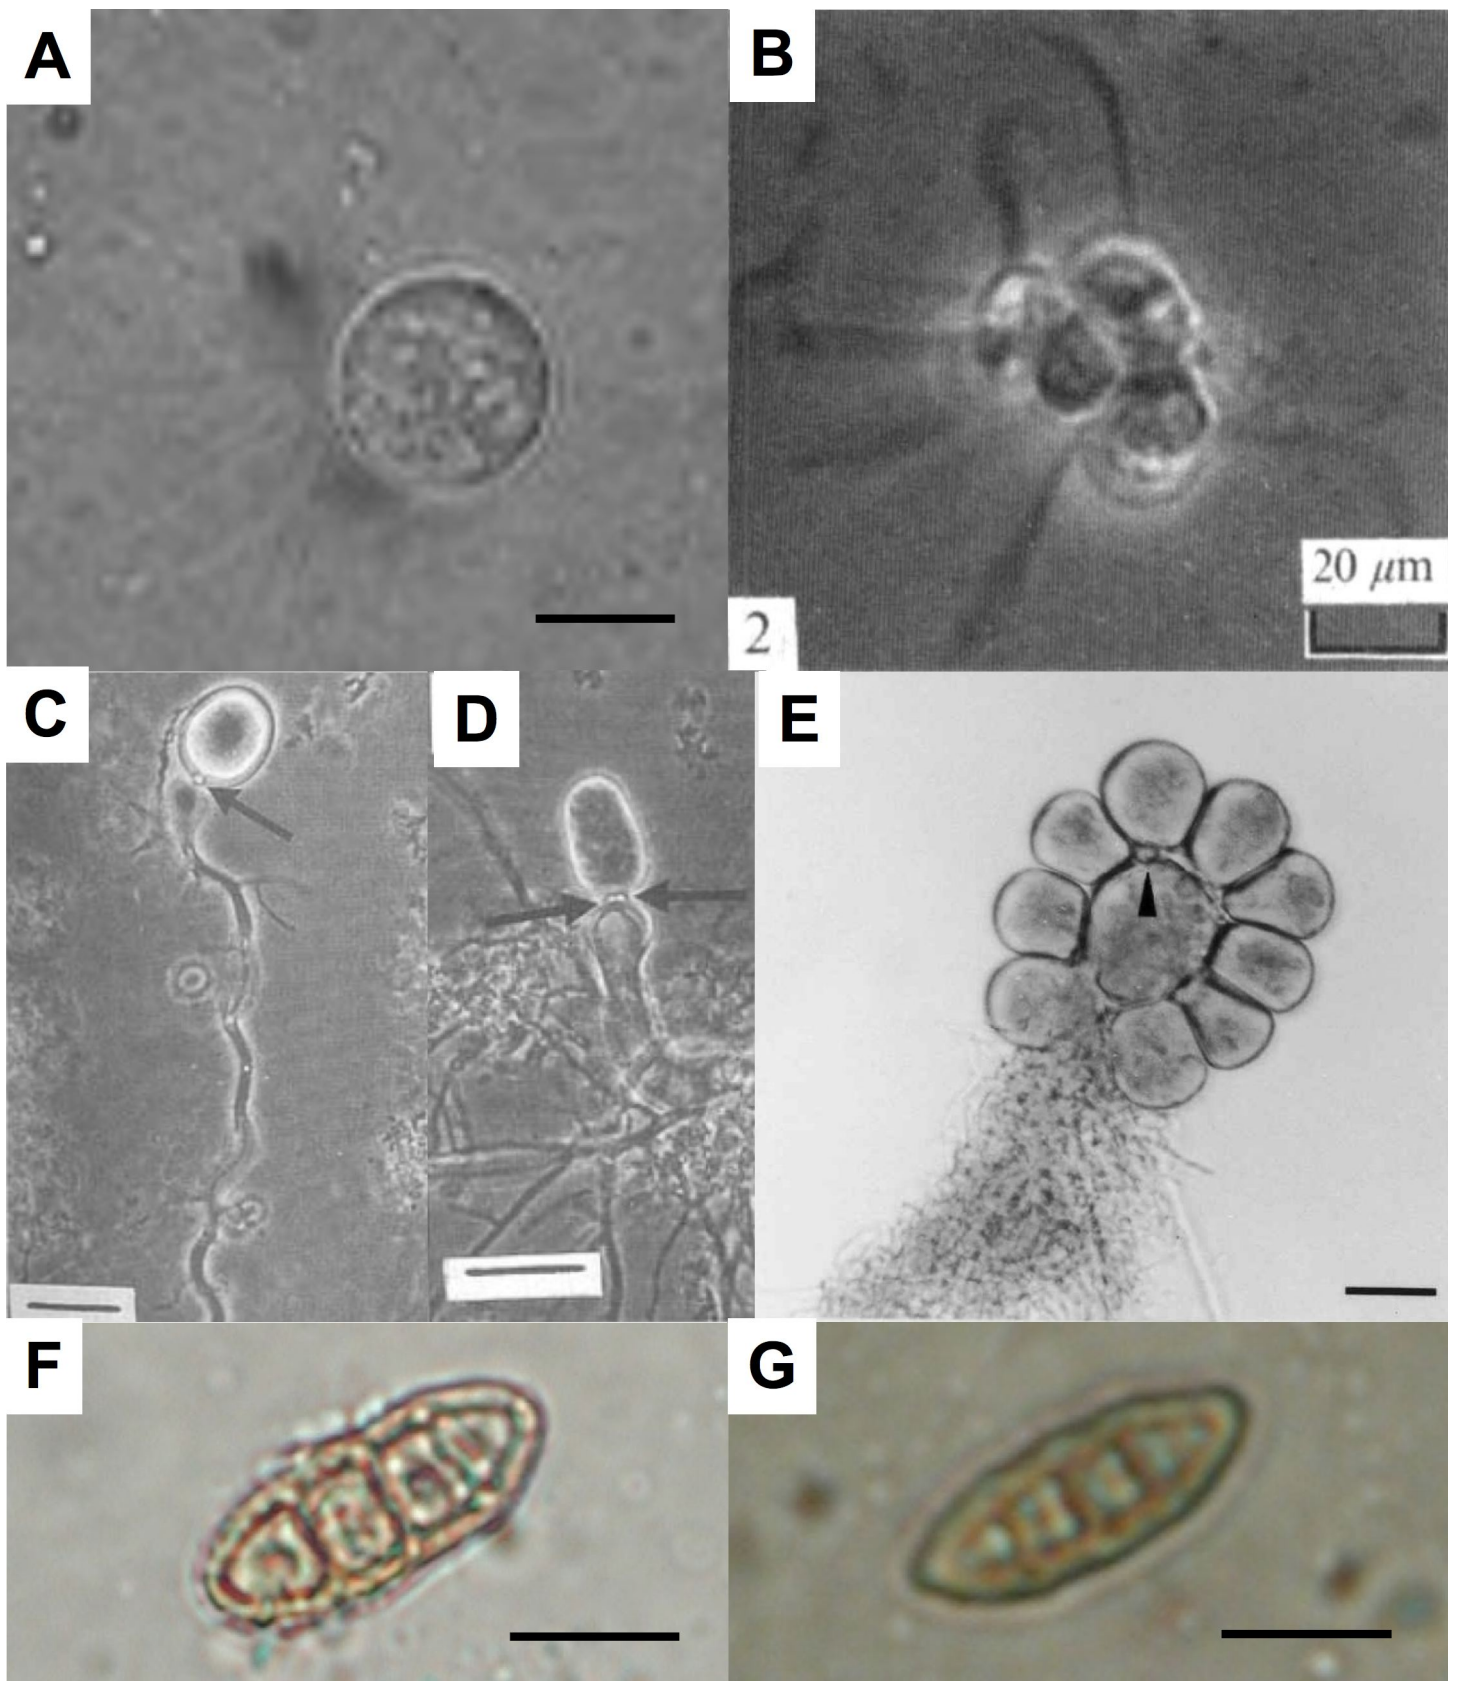

**SuppFig. 1.** Putative fused zoospores in isolate GE09 (A) and the similar structure reported by Orpin (1975) (B). Swollen sporangiophores and twisted rhizoids, as found in isolate GE09, were also reported for *Piromyces spiralis* (C, D) by Ho *et al.* (1993), whilst *Anaeromyces* (formerly *Piromyces*) *polycephalus* also forms a swollen sporangiophore (E). In older cultures of GE09, thick walled putative spore structures were frequently observed (F, G).

Scalebar indicates 20 µm. A video of the putative fused zoospore is found at: <https://www.youtube.com/watch?v=im14hz1jiX0>.
